# Supplementary material
Source: PubMed Central journal article supplement (PMC9130394)
Supplement: 11606_2021_6969_MOESM1_ESM.pdf [file 11606_2021_6969_MOESM1_ESM.pdf]

## **Online Supplement**

### **Table of Contents**

**Appendix A.** List of Stop Codes Used to Identify Telehealth, SUD, and Mental Health Encounters

**Appendix B.** Schematic for Classification of Telehealth Exposure Variable

**Appendix C.** Frequency of Most Common Types of Primary Stop Codes Utilized

**Appendix D.** Frequency of Telehealth Encounters by Year

**Appendix E.** Sensitivity Analyses of Telehealth Utilization and Risk of Discontinuation within 1 year from Buprenorphine Treatment Initiation among Veterans Treated in the VHA, 2008-2017

**Appendix A. List of Stop Codes to Identify Telehealth and Mental Health Stop Codes\***

| <b>Stop Codes Identifying Telehealth</b>                                                        |                                                                                                                                                                                                                                                                                     |
|-------------------------------------------------------------------------------------------------|-------------------------------------------------------------------------------------------------------------------------------------------------------------------------------------------------------------------------------------------------------------------------------------|
| <b>Stop Code</b>                                                                                | <b>Description/Notes</b>                                                                                                                                                                                                                                                            |
| 690                                                                                             | Records at the patient's site (originating site), real time clinical video telehealth care provided to patients.                                                                                                                                                                    |
| 692                                                                                             | Records at the provider site, real time clinical video telehealth care provided to patients where the site of the provider and the site of the patient share the same STA3 (Company Code) such as in the case of a Community-Based Outpatient Clinic (CBOC) and its parent station. |
| 693                                                                                             | Records at the provider site, real time clinical video telehealth care provided to patients where the site of the provider and the site of the patient have a different STA3 (Company Code).                                                                                        |
| 644, 645                                                                                        | Records at the patient site (originating site), real time clinical video telehealth care provided to patients by a provider at a National Telehealth Center.                                                                                                                        |
| 648                                                                                             | Records at the provider site (distant site), real time clinical video telehealth care provided to patients at a non-VAMC location (i.e., Vet Center, University Clinic, Indian Health Service Clinic).                                                                              |
| 179                                                                                             | Records workload using real-time videoconferencing as a means to replicate aspects of face-to-face assessment and care delivery to patients in their homes.                                                                                                                         |
| <b>Example Stop Codes Identifying Mental Health Care Services and Substance Use Dependence†</b> |                                                                                                                                                                                                                                                                                     |
| <b>Stop Code</b>                                                                                | <b>Description/Notes</b>                                                                                                                                                                                                                                                            |
| 502                                                                                             | Mental Health Clinic; Records individual patient visit for the evaluation, consultation, and/or treatment by clinical staff trained in mental diseases and disorders. Includes provider and support services.                                                                       |
| 503                                                                                             | Mental Health Residential Care; Documents visits to Veterans with mental health needs residing in VA approved community residential care homes, medical foster homes, assisted living, personal care homes, and family care homes by VA personnel.                                  |
| 509                                                                                             | Psychiatry – Individual; Records patient visit for the purpose of evaluation, follow-up and treatment provided by a physician trained in mental, emotional and behavioral disorders.                                                                                                |
| 510                                                                                             | Psychology – Individual; Records patient visit for the purpose of evaluation, follow-up, and treatment provided by a psychologist.                                                                                                                                                  |
| 512                                                                                             | Mental Health Consultation; Records patient consultation with a health care provider trained in mental, emotional and behavioral disorders.                                                                                                                                         |
| <b>513</b>                                                                                      | <b>Substance Use Disorder Individual;</b> Records patient visit for individual evaluation, consultation, follow-up, and treatment provided by a facility's formal Substance Use Disorder Treatment Program. Includes provider and support services.                                 |
| 516                                                                                             | Group PTSD; Records consultation and/or treatment follow-up provided to more than one individual. Treatment is provided to those patients with PTSD.                                                                                                                                |
| <b>519</b>                                                                                      | <b>Substance Use Disorder/PTSD Teams;</b> Records visits to a treatment team designed to treat substance use disorders (drug and alcohol) in conjunction with PTSD (SUPT).                                                                                                          |
| <b>523</b>                                                                                      | <b>Opioid Substitution;</b> Records treatment in the facility's formal licensed DEA and Joint Commission accredited opioid substitution substance abuse program for opiate dependent clients (including methadone maintenance)                                                      |
| 539                                                                                             | MH Integrated Care Group; Records group patient visits for mental health integrated care by a mental health provider in Primary Care-Mental Health Integrated programs.                                                                                                             |
| <b>547</b>                                                                                      | <b>Intense Substance Use Disorder Group;</b> Records group visits for intensive substance use disorder services provided by substance use disorder treatment program staff.                                                                                                         |

**Appendix A. List of Stop Codes to Identify Telehealth and Mental Health Stop Codes\***

|     |                                                                                                                                                                                                                                                                                                                                                         |
|-----|---------------------------------------------------------------------------------------------------------------------------------------------------------------------------------------------------------------------------------------------------------------------------------------------------------------------------------------------------------|
| 54  | <b>Intense Substance Use Disorder Individual;</b> Records individual visit for intensive substance use disorder services provided by substance use disorder treatment program staff.                                                                                                                                                                    |
| 550 | Mental Health Clinic – Group; Records services assigned to a group of outpatients by any clinical specialty assigned to the Mental Health Clinic                                                                                                                                                                                                        |
| 557 | Psychiatry Group; Use by psychiatrist only when care is not delivered in an interdisciplinary setting such as a Mental Health Clinic or PTSD Clinical Team.                                                                                                                                                                                             |
| 558 | Psychology Group; Use when the psychologist’s care is not delivered in an interdisciplinary clinic setting such as a Mental Health Clinic or PTSD Clinical Team.                                                                                                                                                                                        |
| 5   | <b>Substance Use Disorder Group;</b> Records patient visit for group evaluation, consultation, follow-up, and treatment provided by a facility's formal Substance Use Disorder Treatment Program.                                                                                                                                                       |
| 564 | MH Team Case Management; Records visit with a patient and/or their families or caregivers by members of a mental health case management team performing mental health community case management at all locations. Includes provider and support services.                                                                                               |
| 566 | MH Risk Factor Reduction Group; Captures workload, primarily psycho-educational in nature, provided in group sessions. Groups typically are informational in nature and are provided by mental health personnel who may teach strategies for accomplishing some therapeutic goal (smoking cessation, diabetic education, cardiac rehabilitation, etc.). |
| 571 | Services for Returning Veterans-Mental Health - Individual; Records patient visit in VA mental health or primary care settings with veterans returning from active duty and/or their families.                                                                                                                                                          |
| 572 | Services for Returning Veterans-Mental Health Group; Records group visits in VA mental health or primary care settings with veterans returning from active duty and/or their families.                                                                                                                                                                  |
| 576 | Psychogeriatric – Individual; Records patient visit for the evaluation, consultation, and/or treatment in a designated psycho-geriatric patient clinic.                                                                                                                                                                                                 |
| 577 | Psychogeriatric – Group; Records treatment, evaluation, and/or rehabilitation provided to a group of patients in a designated psycho-geriatric clinic.                                                                                                                                                                                                  |
| 590 | Community Outreach Homeless Veterans; Community Outreach to Homeless Veterans by Staff other than HCHV and RRTP Programs Records outreach services to Veterans carried out by VA staff other than designated staff of the HCHV or RRTP (Residential Rehabilitation Treatment Programs) programs.                                                        |
| 591 | Incarcerated Veterans Re-Entry; Records interventions for incarcerated Veterans exiting correctional institutions and reentering community living.                                                                                                                                                                                                      |
| 592 | Veterans Justice Outreach; Records interventions for justice-involved Veterans who a) have crisis encounters with law enforcement in the community, or b) have been arrested and are in jail custody, or c) are being adjudicated or monitored in court settings.                                                                                       |
| 596 | Admission Screening Services; Records all activities associated and involved in the screening and admitting process of patients applying for RRTP care.                                                                                                                                                                                                 |
| 598 | Outpatient Individual; Records provision of individual therapy by RRTP staff for Veterans screened and approved while awaiting admission to a mental health RRTP.                                                                                                                                                                                       |

Adapted from (1) Adams SV, Mader MJ, Bollinger MJ, Long ES, Hudson TJ, Pittman AJ. Utilization of Interactive Clinical Video Telemedicine by Rural and Urban Veterans in the Veterans Health Administration Health Care System. *J Rural Health*. 2019;35:308-318; and (2) National Association of Veteran Affairs Optometrists. 14 Active DSS Identifiers. Available at <https://www.navao.org/wp-content/uploads/2016/02/14-Active-DSS-Identifiers.pdf>. Accessed 2/9/2021

**Appendix A. List of Stop Codes to Identify Telehealth and Mental Health Stop Codes\***

† Bolded stop codes used for substance use disorder visits



### Appendix C. Frequency of Most Common Types of Primary Stop Codes Utilized

| <b>Substance Use Dependence Encounters</b>           |           |          |                     |
|------------------------------------------------------|-----------|----------|---------------------|
|                                                      | <b>N</b>  | <b>%</b> | <b>Cumulative %</b> |
| <b>Video-Specific Telehealth (N=41,134)</b>          |           |          |                     |
| Substance Use Disorder (Individual)                  | 24,039    | 58.4     | 58.4                |
| Substance Use Disorder (Group)                       | 10,154    | 24.7     | 83.1                |
| Opioid Treatment Program                             | 5,056     | 12.3     | 95.4                |
| Intense Substance Use Disorder (Group)               | 1,799     | 4.4      | 99.8                |
| Intense Substance Use Disorder (Individual)          | 84        | 0.2      | 100.0               |
| <b>General Telemedicine (N=44,503)</b>               |           |          |                     |
| Substance Use Disorder (Individual)                  | 24,039    | 54.0     | 54.0                |
| Substance Use Disorder (Group)                       | 10,154    | 22.8     | 76.8                |
| Opioid Treatment Program                             | 5,056     | 11.4     | 88.2                |
| Telephone SUD                                        | 2,099     | 4.7      | 92.9                |
| Intense Substance Use Disorder (Group)               | 1,799     | 4.0      | 97.0                |
| <b>In-Person Encounters (N=3,060,433)</b>            |           |          |                     |
| Substance Use Disorder (Individual)                  | 1,048,081 | 34.2     | 34.2                |
| Substance Use Disorder (Group)                       | 823,284   | 26.9     | 61.1                |
| Opioid Treatment Program                             | 709,056   | 23.2     | 84.3                |
| Intense Substance Use Disorder (Group)               | 285,599   | 9.3      | 93.6                |
| Residential Rehabilitation Treatment Program (Group) | 49,567    | 1.6      | 95.3                |
| <b>Mental Health Encounters</b>                      |           |          |                     |
|                                                      | <b>N</b>  | <b>%</b> | <b>Cumulative %</b> |
| <b>Video-Specific Telehealth (N=63,055)</b>          |           |          |                     |
| Substance Use Disorder (Individual)                  | 24,039    | 38.1     | 38.1                |
| Mental Health Clinic (Individual)                    | 15,056    | 23.9     | 62.0                |
| Substance Use Disorder (Group)                       | 10,154    | 16.1     | 78.1                |
| Opioid Treatment Program                             | 5,056     | 8.0      | 86.1                |
| Intense Substance Use Disorder (Group)               | 1,799     | 2.9      | 89.0                |
| <b>General Telemedicine (N=102,138)</b>              |           |          |                     |
| Telephone Mental Health                              | 32,145    | 31.5     | 31.5                |
| Substance Use Disorder (Individual)                  | 24,039    | 23.5     | 55.0                |
| Mental Health Clinic (Individual)                    | 15,056    | 14.7     | 69.7                |
| Substance Use Disorder (Group)                       | 10,154    | 9.9      | 79.7                |
| Telephone SUD                                        | 6,297     | 6.2      | 85.9                |
| <b>In-Person Encounters (N=5,272,695)</b>            |           |          |                     |
| Substance Use Disorder (Individual)                  | 1,048,081 | 19.9     | 19.9                |
| Substance Use Disorder (Group)                       | 823,284   | 15.6     | 35.5                |
| Opioid Treatment Program                             | 709,056   | 13.4     | 48.9                |
| Mental Health Clinic (Individual)                    | 687,107   | 13.0     | 62.0                |
| Intense Substance Use Disorder (Group)               | 285,599   | 5.4      | 67.4                |

## Appendix D. Frequency of Telehealth Encounters by Year

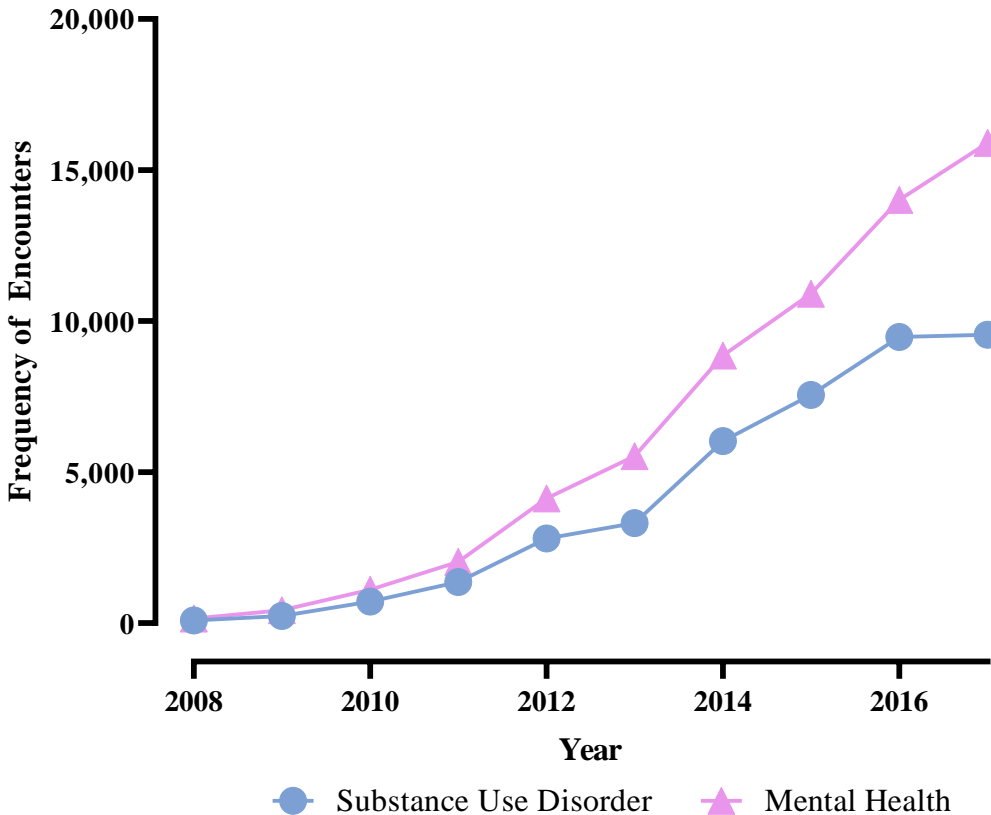

## Appendix E. Sensitivity Analyses of Telehealth Utilization and Risk of Discontinuation within 1 year from Buprenorphine Treatment Initiation among Veterans Treated in the VHA, 2008-2017

### A. Substance Use Disorder

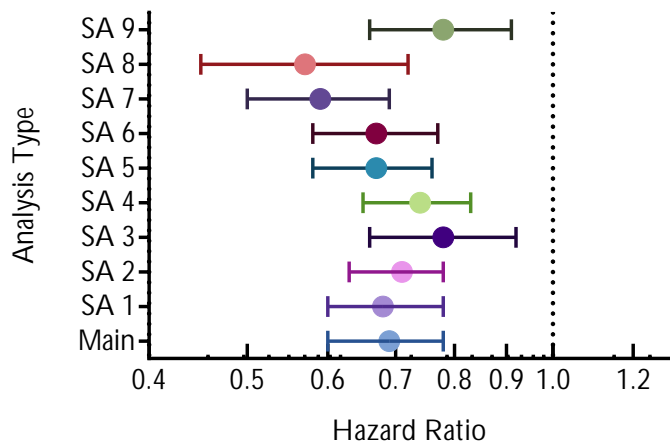

### B. Mental Health

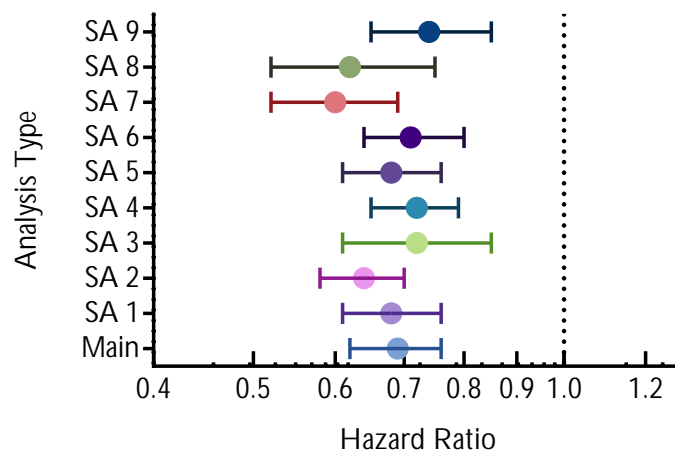

Main: Represents main analysis results as displayed in Table 2

SA 1: Excludes low utilizers of the VHA prior to treatment initiation as a method of accounting for incomplete co-morbidity data

SA 2: Limits analysis to those who continued buprenorphine treatment beyond 28 days

SA 3: Limits analysis to 10 facilities most frequently using telehealth

SA 4: Addresses potential outcome misclassification using a definition of discontinuation of no treatment for 7 days

SA 5: Addresses potential outcome misclassification using a definition of discontinuation of no treatment for 28 days

SA 6: Addresses potential outcome misclassification using a definition of discontinuation of no treatment for 90 days

SA 7: Addresses potential exposure misclassification using 14 days of exposure effects of a visit compared to the main analysis of 28 days of no encounters

SA 8: Accounts for impact of telehealth on treatment discontinuation for those with previous telehealth encounters for mental health or substance dependence

SA 9: Accounts for impact of telehealth on treatment discontinuation for those naïve to telehealth for mental health or substance dependence prior to treatment initiation
